# Supplementary material for: NADPH oxidase 4 is required for the generation of macrophage migration inhibitory factor and host defense against Toxoplasma gondii infection
Source: PubMed Central journal article supplement (PMC5526938; doi:10.1038/s41598-017-06610-4), 2017-07-25

**NADPH oxidase 4 is required for the generation of macrophage migration  
inhibitory factor and host defense against *Toxoplasma gondii* infection.**

Ji Hye Kim<sup>1,2¶</sup>, Jina Lee<sup>1,2¶</sup>, Su-Jin Bae<sup>1,2</sup>, Ye-Eun Kim<sup>1</sup>, Byung-Joon Park<sup>1,2</sup>, Jae-Won Choi<sup>1,2</sup>,  
Jaeyul Kwon<sup>2,3</sup>, Guang-Ho Cha<sup>1,2</sup>, Heon Jong Yoo<sup>4</sup>, Eun-Kyeong Jo<sup>2,5</sup>, Yun Soo Bae<sup>6</sup>, Young-  
Ha Lee<sup>1,2\*</sup>, Jae-Min Yuk<sup>1,2\*</sup>

## Supplementary Information

### Supplementary Figure S1. *T.gondii* infection activates the mRNA expression of *Mif* in BMDMs.

(A) BMDMs were infected with *T.gondii* RH strain (moi = 1) for the indicated time periods and then cell lysate was collected. The mRNA expression for *Mif* and *actb* was determined using semiquantitative RT-PCR (top) or quantitative real-time PCR analysis (qPCR; bottom) analysis. (B and C) BMDMs were infected with *T.gondii* RH strain (moi = 0.2, 0.5, and 1) for 18 h. (B) Cell lysates were subjected to SDS-PAGE, followed by western blot analysis using anti-MIF and anti- $\beta$ -tubulin Abs. (C) The mRNA expression for *Mif* and *actb* was determined using semiquantitative RT-PCR (top) or qPCR (bottom) analysis. Data are representative of three independent experiments and are presented as means  $\pm$  SD. \*\*\*P < 0.001, two-tailed Student's t-test.

### Supplementary Figure S2. Knockdown of MIF in macrophages leads to an increased expression of *sag1* mRNA.

BMDM were transduced with lentiviruses expressing shNS or shMIF (at MOI of 1, 5, and 20 for top or 5 for bottom) for 48 h with polybrene (8  $\mu$ g/mL) and then infected with *T.gondii* RH strain for 18 h. The mRNA expression for *Mif* and *actb* was determined using semiquantitative RT-PCR (top). qPCR were assessed to determine *sag1* mRNA expression in whole-cell lysates (bottom).

### Supplementary Figure S3. *T.gondii* infection induces the generation of hydrogen peroxides in BMDMs.

BMDMs were infected with *T.gondii* RH strain (moi=1) for indicated times and then stained with

H2DCFDA (20  $\mu$ M) for 20 min. Intracellular ROS generation was measured using a fluorescence microscope. Scale bar = 100  $\mu$ m. H<sub>2</sub>O<sub>2</sub> (1 mM, 30 min) was used for positive control.

**Supplementary Figure S4. *T.gondii* infection enhances NF- $\kappa$ B transcriptional activity in Raw 264.7 cells in a time - or moi - dependent manner.**

(A and B) Raw 264.7 cells were transfected with plasmids carrying NF- $\kappa$ B luciferase reporter constructs before *T.gondii* RH strain (moi = 1, for A; indicated moi, for B) for various time periods (for A) or 18 h (for B). Luciferase assays were performed based on normalization to the  $\beta$ -galactosidase activity. Data are representative of three independent experiments and are presented as means  $\pm$  SD. \*P < 0.05, \*\*P < 0.01, \*\*\*P < 0.001, two-tailed Student's t-test.

**Supplementary Figure S5. Analysis of the mRNA expression of various surface receptors on *T.gondii*-infected *Nox4*<sup>+/+</sup> and *Nox4*<sup>-/-</sup> BMDMs.**

(A-C) BMDMs from *Nox4*<sup>+/+</sup> and *Nox4*<sup>-/-</sup> mice were infected with *T.gondii* RH strain (moi = 1) for the indicated time periods and then cell lysate was collected. The mRNA expression for *Ifngr1* (for A), *Ccr5* (for B), and *Tlr4* (for C) were determined using qPCR analysis. Data are representative of three independent experiments and are presented as means  $\pm$  SD. \*P < 0.05, \*\*\*P < 0.001, two-tailed Student's t-test.

**Supplementary Figure S6. *Nox4*-deficient mice exhibit an impaired production of inflammatory cytokine TNF $\alpha$  in response to *T.gondii* ME49 strain infection.**

(A and B) *Nox4*<sup>+/+</sup> and *Nox4*<sup>-/-</sup> mice (n = 5 per genotype) were infected with 40 cysts of *T.gondii*

ME49 strain (i.p. injection) for 20 days. Levels of Serum TNF $\alpha$  (for A) and IL-12p40 (for B) from *Nox4*<sup>+/+</sup> and *Nox4*<sup>-/-</sup> mice were assessed by ELISA analysis. \*\*\*P < 0.001, compared with *Nox4*<sup>+/+</sup> mice infected with *T.gondii* (two-tailed Student's t-test).



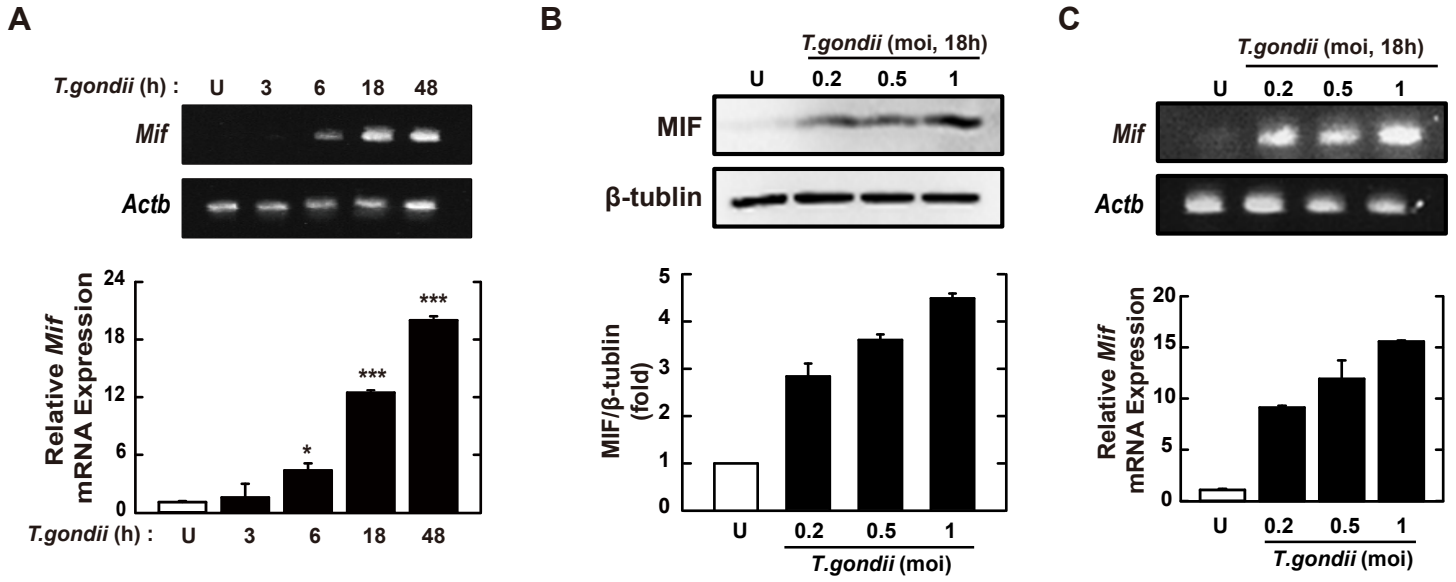

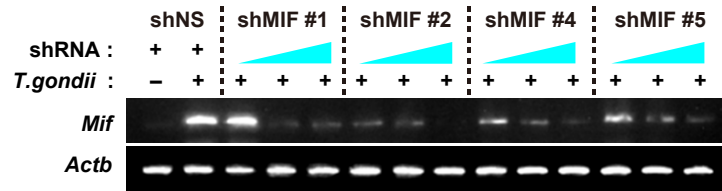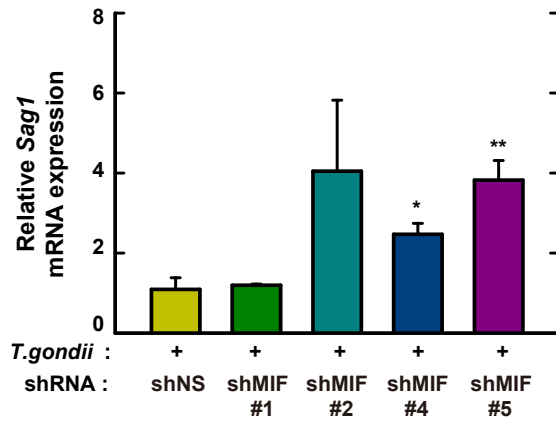

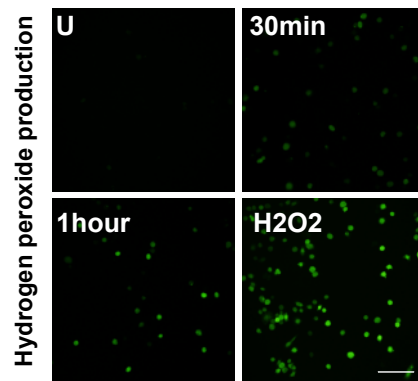

A

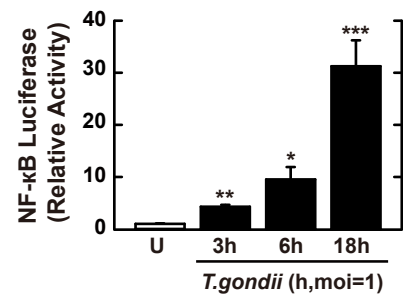

B

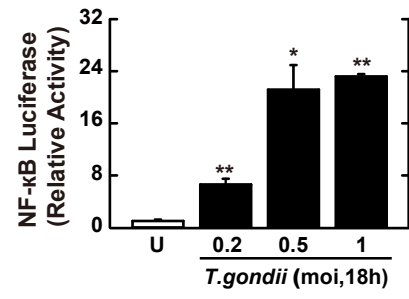

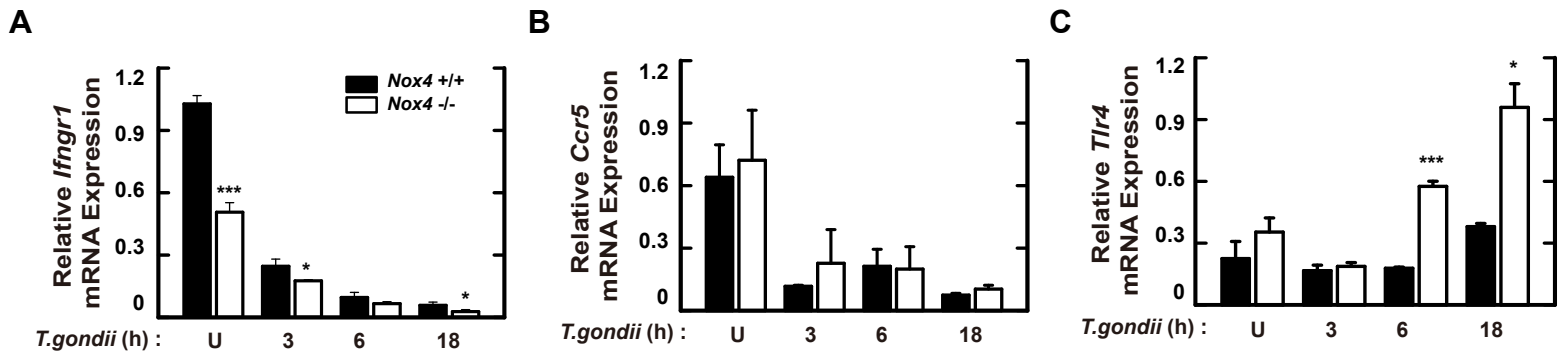

**A**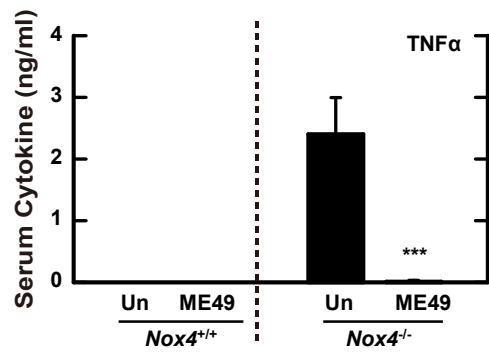**B**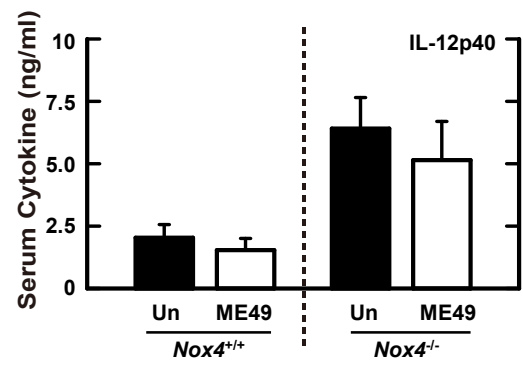

Supplement: 41598_2017_6610_MOESM1_ESM.pdf [file 41598_2017_6610_MOESM1_ESM.pdf]
